# Supplementary material for: Brown carbon in fine particles in four typical cities in Northwest China during wintertime: coupling optical properties with chemical processes
Source: Copernicus journal article supplement (doi:10.5194/egusphere-2023-752), 2023-05-12
Supplement: Supplementary file 1 [file egusphere-2023-752-supplement-version3.pdf]

*Supporting information for:*

**Characterizing water-soluble brown carbon in fine particles  
in four typical cities in Northwest China during wintertime:  
Integrating optical properties with chemical processes**

Miao Zhong<sup>a,b</sup>, Jianzhong Xu<sup>a,\*</sup>, Huiqin Wang<sup>c</sup>, Li Gao<sup>d</sup>, Haixia Zhu<sup>e</sup>, Lixiang  
Zhai<sup>a,b</sup>, Xinghua Zhang<sup>a</sup>, Wenhui Zhao<sup>a,b</sup>

<sup>a</sup>State Key Laboratory of Cryospheric Sciences, Northwest Institute of Eco-Environment and  
Resources, Chinese Academy of Sciences, Lanzhou 730000, China

<sup>b</sup>University of Chinese Academy of Sciences, Beijing 100049, China

<sup>c</sup>Institute of Desert Meteorology, China Meteorological Administration, Urumqi 830002, China

<sup>d</sup>School of Geography and Planning, Ningxia University, Yinchuan 750021, China

<sup>e</sup>Key Laboratory of Comprehensive and Highly Efficient Utilization of Salt Lake Resources, Qinghai  
Institute of Salt Lakes, Chinese Academy of Science, Xining, Qinghai 810008, China

*Corresponding to:* Jianzhong Xu (jzxu@lzb.ac.cn)

Table S1. The daily average concentrations of PM<sub>2.5</sub>, SO<sub>2</sub>, NO<sub>2</sub>, CO, O<sub>3</sub>, T, and RH in YC, XN, UR and LZ during sampling time (Data from air quality database in China).

| Sampling Site | Sample ID | Sampling Date | PM <sub>2.5</sub> (µg/m <sup>3</sup> ) | SO <sub>2</sub> (µg/m <sup>3</sup> ) | NO <sub>2</sub> (µg/m <sup>3</sup> ) | CO (mg/m <sup>3</sup> ) | O <sub>3</sub> (µg/m <sup>3</sup> ) |
|---------------|-----------|---------------|----------------------------------------|--------------------------------------|--------------------------------------|-------------------------|-------------------------------------|
| YC            | 1         | 12/6/2019     | 77                                     | 26                                   | 74                                   | 2                       | 81                                  |
|               | 2         | 12/9/2019     | 26                                     | 9                                    | 32                                   | 0.7                     | 92                                  |
|               | 3         | 12/12/2019    | 63                                     | 35                                   | 63                                   | 2.2                     | 62                                  |
|               | 4         | 12/16/2019    | 59                                     | 10                                   | 45                                   | 1.2                     | 50                                  |
|               | 5         | 12/19/2019    | 104                                    | 14                                   | 50                                   | 1.1                     | 65                                  |
|               | 6         | 12/23/2019    | 79                                     | 31                                   | 55                                   | 1.8                     | 62                                  |
|               | 7         | 12/26/2019    | 16                                     | 10                                   | 31                                   | 0.6                     | 83                                  |
|               | 8         | 12/30/2019    | 37                                     | 27                                   | 40                                   | 1.3                     | 62                                  |
|               | 9         | 1/2/2020      | 118                                    | 68                                   | 77                                   | 3.5                     | 34                                  |
|               | 10        | 1/6/2020      | 123                                    | 18                                   | 55                                   | 2.1                     | 42                                  |
|               | 11        | 1/9/2020      | 213                                    | 29                                   | 75                                   | 3                       | 57                                  |
|               | 12        | 1/13/2020     | 79                                     | 8                                    | 51                                   | 1.3                     | 72                                  |
|               | 13        | 1/16/2020     | 93                                     | 10                                   | 47                                   | 1.4                     | 61                                  |
|               | 14        | 1/20/2020     | 39                                     | 18                                   | 42                                   | 0.9                     | 73                                  |
| XN            | 15        | 12/5/2019     | 51                                     | 31                                   | 54                                   | 1.7                     | 74                                  |
|               | 16        | 12/9/2019     | 37                                     | 24                                   | 53                                   | 1.7                     | 76                                  |
|               | 17        | 12/12/2019    | 59                                     | 34                                   | 50                                   | 2.1                     | 39                                  |
|               | 18        | 12/16/2019    | 54                                     | 16                                   | 52                                   | 1.3                     | 60                                  |
|               | 19        | 12/19/2019    | 57                                     | 14                                   | 56                                   | 2.1                     | 88                                  |
|               | 20        | 12/23/2019    | 42                                     | 31                                   | 54                                   | 2                       | 77                                  |
|               | 21        | 12/26/2019    | 47                                     | 16                                   | 45                                   | 1.3                     | 70                                  |
|               | 22        | 12/30/2019    | 37                                     | 26                                   | 48                                   | 1.6                     | 77                                  |
|               | 23        | 1/2/2020      | 85                                     | 32                                   | 66                                   | 2.3                     | 75                                  |
|               | 24        | 1/7/2020      | 38                                     | 13                                   | 54                                   | 2.2                     | 90                                  |
|               | 25        | 1/9/2020      | 57                                     | 11                                   | 43                                   | 1.1                     | 100                                 |
|               | 26        | 1/13/2020     | 69                                     | 21                                   | 46                                   | 1.5                     | 93                                  |
|               | 27        | 1/16/2020     | 89                                     | 17                                   | 47                                   | 2                       | 79                                  |
|               | 28        | 1/20/2020     | 78                                     | 21                                   | 43                                   | 1.6                     | 100                                 |

| Sampling Site | Sample ID | Sampling Date | PM <sub>2.5</sub> (µg/m <sup>3</sup> ) | SO <sub>2</sub> (µg/m <sup>3</sup> ) | NO <sub>2</sub> (µg/m <sup>3</sup> ) | CO (mg/m <sup>3</sup> ) | O <sub>3</sub> (µg/m <sup>3</sup> ) |
|---------------|-----------|---------------|----------------------------------------|--------------------------------------|--------------------------------------|-------------------------|-------------------------------------|
| UR            | 29        | 12/5/2019     | 156                                    | 12                                   | 86                                   | 2.6                     | 49                                  |
|               | 30        | 12/9/2019     | 169                                    | 4                                    | 70                                   | 2.1                     | 29                                  |
|               | 31        | 12/12/2019    | 151                                    | 5                                    | 66                                   | 3.1                     | 19                                  |
|               | 32        | 12/16/2019    | 65                                     | 3                                    | 42                                   | 1.3                     | 36                                  |
|               | 33        | 12/19/2019    | 57                                     | 5                                    | 42                                   | 1.2                     | 23                                  |
|               | 34        | 12/23/2019    | 55                                     | 6                                    | 42                                   | 1.1                     | 49                                  |
|               | 35        | 12/26/2019    | 82                                     | 7                                    | 55                                   | 2.1                     | 25                                  |
|               | 36        | 12/30/2019    | 137                                    | 8                                    | 61                                   | 2.2                     | 38                                  |
|               | 37        | 1/2/2020      | 111                                    | 8                                    | 71                                   | 2.2                     | 29                                  |
|               | 38        | 1/6/2020      | 186                                    | 6                                    | 87                                   | 2.6                     | 24                                  |
|               | 39        | 1/9/2020      | 178                                    | 8                                    | 90                                   | 2.9                     | 17                                  |
|               | 40        | 1/13/2020     | 148                                    | 8                                    | 63                                   | 2.3                     | 56                                  |
|               | 41        | 1/16/2020     | 142                                    | 7                                    | 54                                   | 1.8                     | 53                                  |
|               | 42        | 1/20/2020     | 106                                    | 9                                    | 52                                   | 1.4                     | 78                                  |
| LZ            | 43        | 12/5/2019     | 97                                     | 34                                   | 102                                  | 2.5                     | 35                                  |
|               | 44        | 12/10/2019    | 88                                     | 49                                   | 86                                   | 2.8                     | 46                                  |
|               | 45        | 12/13/2019    | 87                                     | 50                                   | 92                                   | 2.8                     | 34                                  |
|               | 46        | 12/16/2019    | 35                                     | 19                                   | 44                                   | 0.8                     | 66                                  |
|               | 47        | 12/20/2019    | 70                                     | 34                                   | 84                                   | 2                       | 48                                  |
|               | 48        | 12/23/2019    | 78                                     | 57                                   | 88                                   | 3.1                     | 28                                  |
|               | 49        | 12/26/2019    | 85                                     | 30                                   | 60                                   | 1.7                     | 36                                  |
|               | 50        | 12/30/2019    | 57                                     | 44                                   | 75                                   | 1.9                     | 39                                  |
|               | 51        | 1/2/2020      | 65                                     | 26                                   | 80                                   | 2.2                     | 21                                  |
|               | 52        | 1/6/2020      | 81                                     | 11                                   | 57                                   | 0.8                     | 68                                  |
|               | 53        | 1/11/2020     | 63                                     | 16                                   | 68                                   | 1.4                     | 72                                  |
|               | 54        | 1/13/2020     | 50                                     | 20                                   | 65                                   | 1.2                     | 56                                  |
|               | 55        | 1/16/2020     | 85                                     | 20                                   | 72                                   | 1.9                     | 52                                  |
|               | 56        | 1/20/2020     | 59                                     | 29                                   | 76                                   | 2.2                     | 54                                  |

Table S2. The excitation and emission wavelengths at the maximum fluorescence intensity of each PARAFAC component.

| PARAFAC | Ex (nm) | Em (nm) | Component    | References                                                    |
|---------|---------|---------|--------------|---------------------------------------------------------------|
| C1      | 230/320 | 375     | LO-HULIS     | (Li et al., 2021)                                             |
| C2      | 215/255 | 364     | -            | (Tang et al., 2020)                                           |
| C3      | 240/325 | 414     | HO-HULIS     | (Chen et al., 2020)                                           |
| C4      | 225/275 | 338     | Protein-like | (Chen et al., 2020)                                           |
| C5      | 210/280 | 373     | LO-HULIS     | (Chen et al., 2020; Chen et al., 2021)                        |
| C6      | 220     | 292     | phenol-like  | (Barsotti et al., 2016; Yan and Kim, 2017; Chen et al., 2020) |

Table S3. Pearson's correlation coefficients calculated through the correlation analysis between water-soluble inorganic ions and WSOC. The bold highlighting the correlation was significant (at the level of 0.05).

| <i>r</i>                      | YC          | XN          | UR          | LZ          |
|-------------------------------|-------------|-------------|-------------|-------------|
| Na <sup>+</sup>               | -0.02       | 0.36        | 0.49        | 0.01        |
| NH <sub>4</sub> <sup>+</sup>  | <b>0.87</b> | <b>0.56</b> | <b>0.73</b> | <b>0.87</b> |
| K <sup>+</sup>                | <b>0.77</b> | <b>0.78</b> | <b>0.54</b> | <b>0.76</b> |
| Ca <sup>2+</sup>              | -0.01       | 0.11        | 0.33        | 0.39        |
| Mg <sup>2+</sup>              | 0.20        | 0.43        | 0.30        | 0.41        |
| Cl <sup>-</sup>               | <b>0.79</b> | 0.45        | <b>0.87</b> | <b>0.75</b> |
| NO <sub>3</sub> <sup>-</sup>  | <b>0.84</b> | <b>0.50</b> | <b>0.67</b> | <b>0.63</b> |
| SO <sub>4</sub> <sup>2-</sup> | <b>0.91</b> | 0.49        | <b>0.73</b> | <b>0.85</b> |

Table S4. Summary of the multiple linear regression results based on four WSOA factors, and regression coefficients B (m<sup>2</sup>/g) represent the fitted MAE value of each WSOA factor.

|         | coefficients          |                |
|---------|-----------------------|----------------|
|         | B (m <sup>2</sup> /g) | Standard Error |
| LO-OOA  | 1.34                  | 0.08           |
| WS-POA  | 1.33                  | 0.08           |
| HO-OOA1 | 1.10                  | 0.12           |
| HO-OOA2 | 0.58                  | 0.09           |

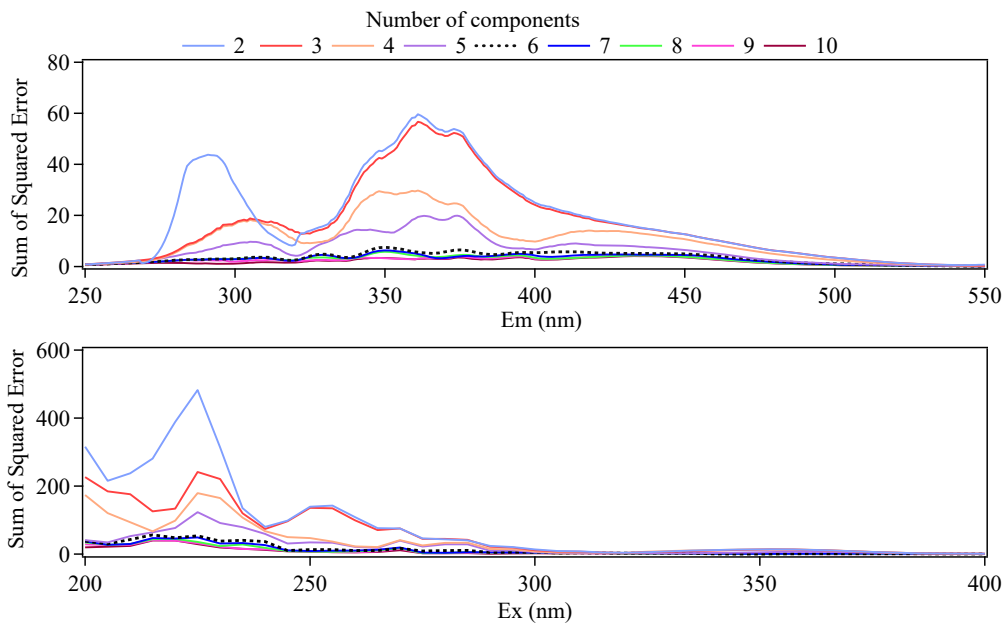

Figure S1. Sum of squared error of excitation and emission wavelength for 2–10 PARAFAC model. The bold black dotted line (C6) indicates the number of factors selected in this work.

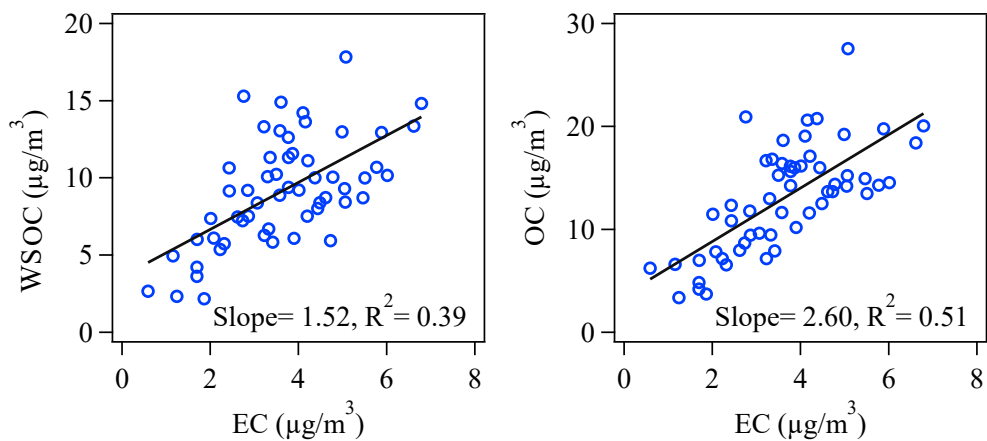

Figure S2. Scatter plots of WSOC, OC versus EC for four cities samples.

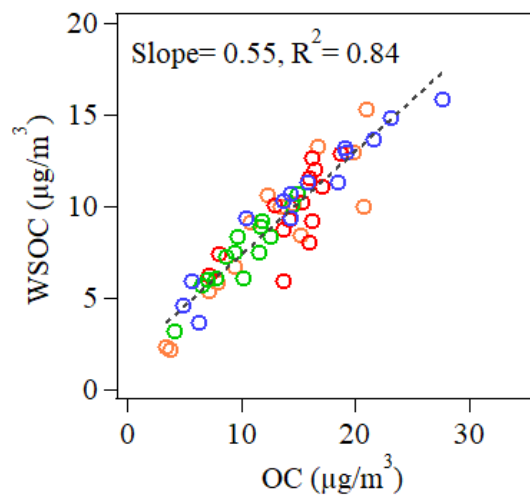

Figure S3. Scatter plots of WSOC versus OC for four cities samples.

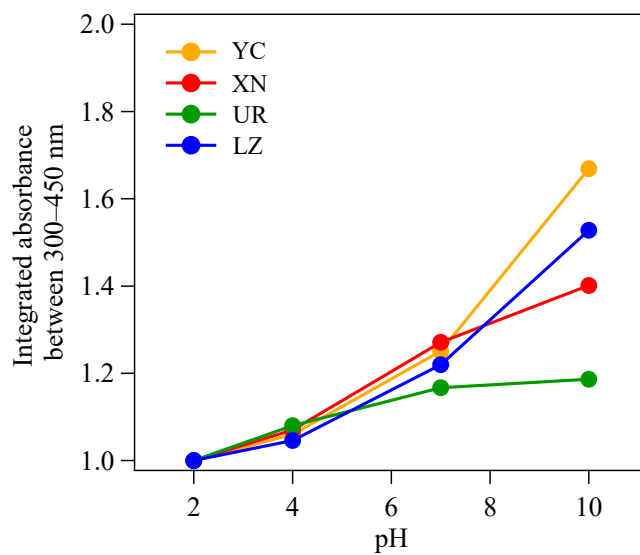

Figure S4. Integrated absorbance (300–450 nm) normalized to values at pH 2 as a function of pH for YC (orange), XN (red), UR (green), and LZ (blue) samples.

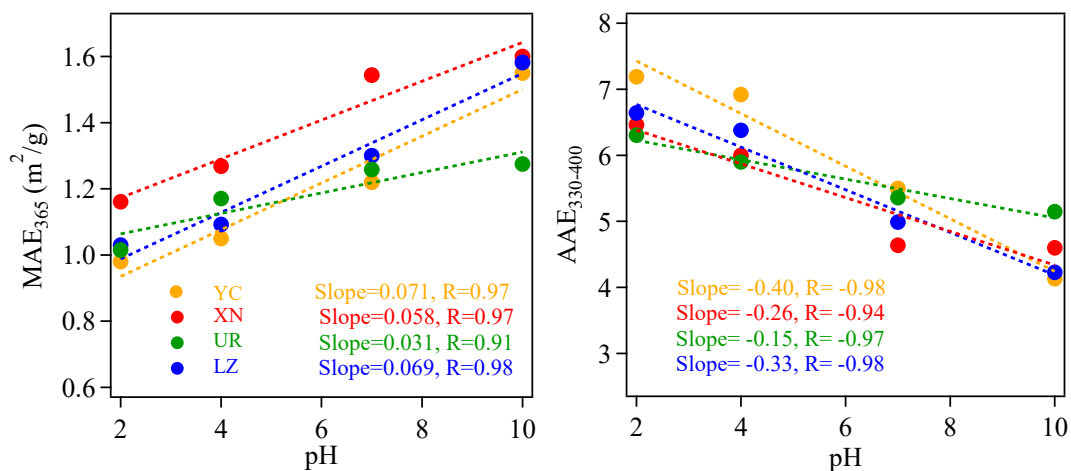

Figure S5. (a) MAE<sub>365</sub> and (b) AAE as a function of pH for YC (orange), XN (red), UR (green), and LZ (blue) samples.

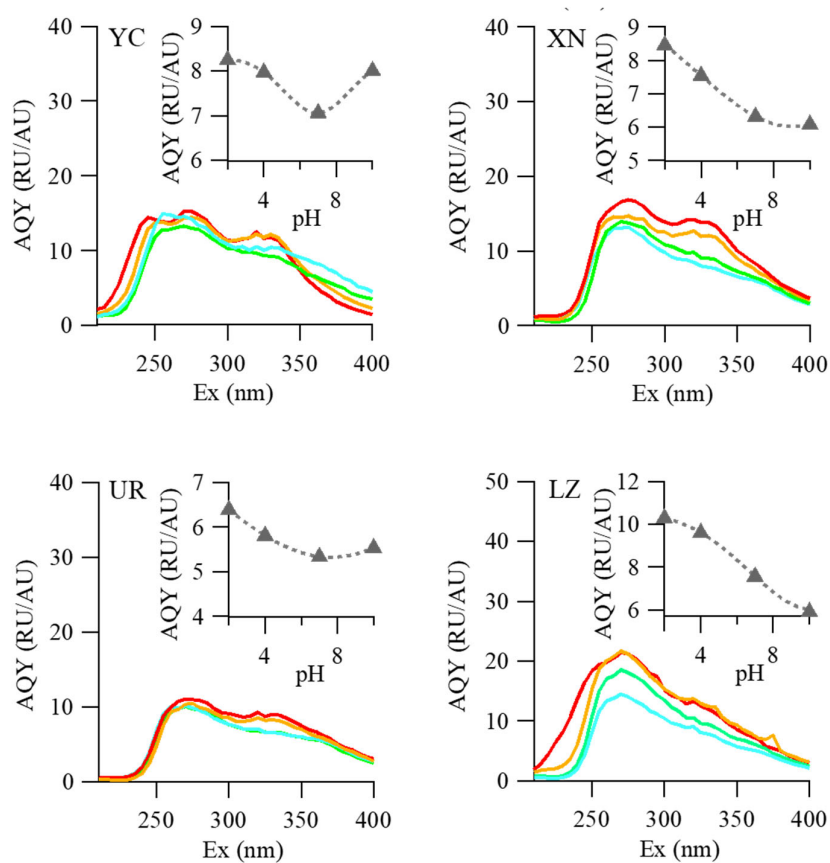

Figure S6. AQY against the excitation wavelength at different pH values. The insert figure shows the average AQY over all excitation wavelengths at different pH.



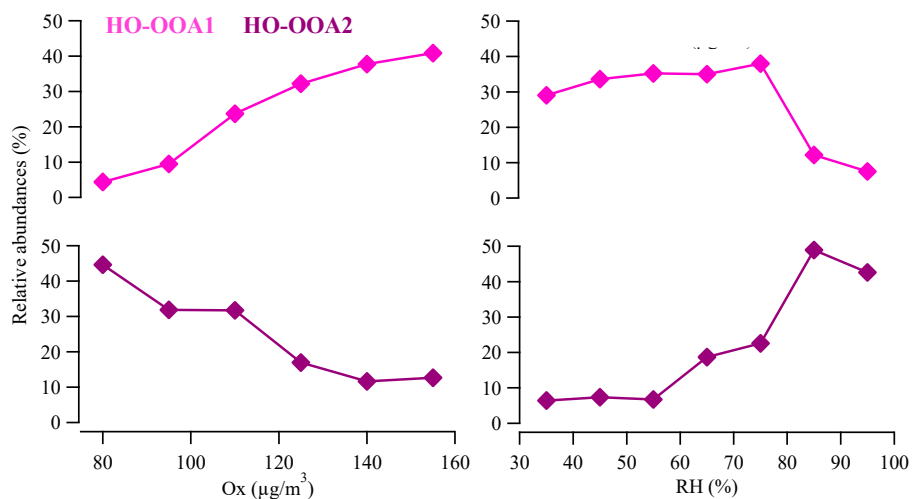

Figure S7. The mass contribution of HO-OOA1 and HO-OOA2 varied with odd oxygen ( $\text{O}_x = \text{O}_3 + \text{NO}_2$ ) and RH. Note that  $\text{O}_x$  was averaged at  $15 \mu\text{g}/\text{m}^3$  intervals and RH was averaged at 10% intervals.

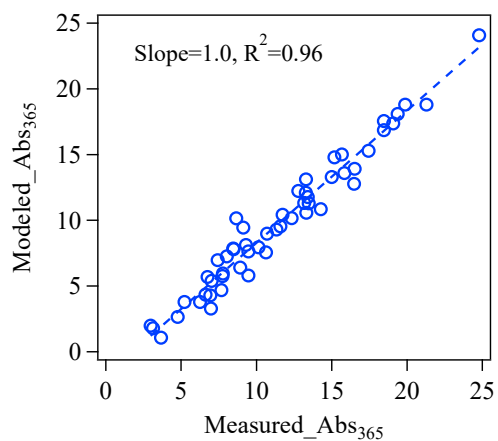

Figure S8. Scatter plot of modeling  $\text{Abs}_{365}$  using multiple linear regression (MLR) analysis versus measured  $\text{Abs}_{365}$  for WSOA in four cities.

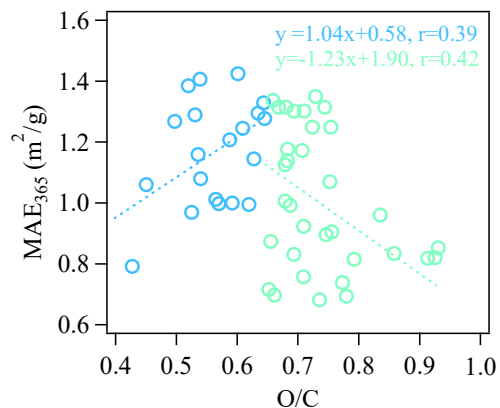

Figure S9.  $MAE_{365}$  as a function of O/C ratio. O/C critical value of 0.64 was selected to divide all samples into two groups (blue and green circles), each group is fitted by least-squares linear regression, and the correlation was significant at the level of 0.05.

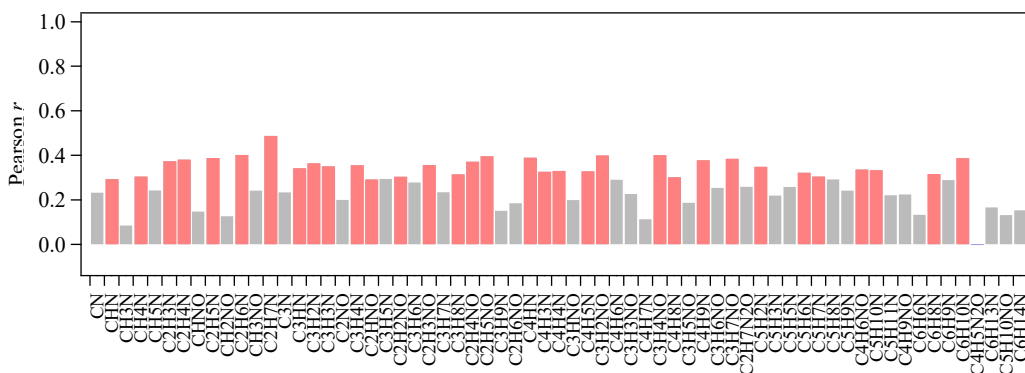

Figure S10. Pearson's correlation coefficients calculated through the correlation analysis between the mass concentration of the N-containing fragments and the light absorption coefficient of WSOA. The red bars highlighting the correlation was significant (at the level of 0.05).

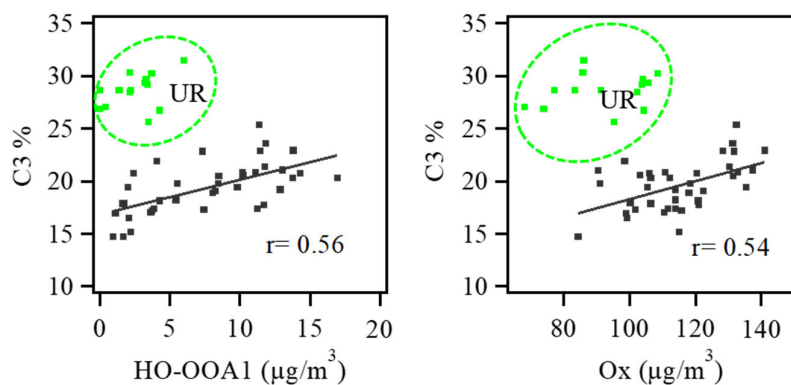

Figure S11. Scatter plots of the relative contents of C3 versus the mass concentration of HO-OOA1 factors and odd oxygen ( $O_x = O_3 + NO_2$ ) for four cities samples. Significant positive correlations observed when UR data (green dots) were excluded.

## References

- Barsotti, F., Ghigo, G., and Vione, D.: Computational assessment of the fluorescence emission of phenol oligomers: A possible insight into the fluorescence properties of humic-like substances (HULIS), *J. Photochem. Photobiol. A Chem.*, 315, 87-93, <https://doi.org/10.1016/j.jphotochem.2015.09.012>, 2016.
- Chen, Q., Hua, X., Li, J., Chang, T., and Wang, Y.: Diurnal evolutions and sources of water-soluble chromophoric aerosols over Xi'an during haze event, in Northwest China, *Sci. Total Environ.*, 786, 147412, <https://doi.org/10.1016/j.scitotenv.2021.147412>, 2021.
- Chen, Q., Li, J., Hua, X., Jiang, X., Mu, Z., Wang, M., Wang, J., Shan, M., Yang, X., Fan, X., Song, J., Wang, Y., Guan, D., and Du, L.: Identification of species and sources of atmospheric chromophores by fluorescence excitation-emission matrix with parallel factor analysis, *Sci. Total Environ.*, 718, 137322, <https://doi.org/10.1016/j.scitotenv.2020.137322>, 2020.
- Li, H., Zhang, Q., Jiang, W., Collier, S., Sun, Y., Zhang, Q., and He, K.: Characteristics and sources of water-soluble organic aerosol in a heavily polluted environment in Northern China, *Sci Total Environ.*, 758, 143970, [10.1016/j.scitotenv.2020.143970](https://doi.org/10.1016/j.scitotenv.2020.143970), 2021.
- Tang, J., Li, J., Su, T., Han, Y., Mo, Y., Jiang, H., Cui, M., Jiang, B., Chen, Y., Tang, J., Song, J., Peng, P. a., and Zhang, G.: Molecular compositions and optical properties of dissolved brown carbon in biomass burning, coal combustion, and vehicle emission aerosols illuminated by excitation–emission matrix spectroscopy and Fourier transform ion cyclotron resonance mass spectrometry analysis, *Atmos. Chem. Phys.*, 20, 2513-2532, <https://doi.org/10.5194/acp-20-2513-2020>, 2020.
- Yan, G. and Kim, G.: Speciation and Sources of Brown Carbon in Precipitation at Seoul, Korea: Insights from Excitation-Emission Matrix Spectroscopy and Carbon Isotopic Analysis, *Environ. Sci. Technol.*, 51, 11580-11587, <https://doi.org/10.1021/acs.est.7b02892>, 2017.
